# Supplementary material for: Dual atomic defect modulation in three-dimensional mesoporous graphene for high-performance potassium ion hybrid capacitors
Source: Royal Society of Chemistry journal article supplement (doi:10.1039/d5qi00267b), 2025-01-01
Supplement: d5qi00267b1.pdf [file d5qi00267b1.pdf]

## Supporting Information

### Dual Atomic Defect Modulation in Three-Dimensional Mesoporous Graphene for High-Performance Potassium Ion Hybrid Capacitors

Yize Wang,<sup>‡a</sup> Wenda Qiu,<sup>\*‡b,c</sup> Peijun Deng,<sup>a</sup> Jing Fu,<sup>a</sup> Guoxian Li,<sup>a</sup> Chunjin Li,<sup>a</sup> Mingzu Zhang,<sup>b</sup> Pingji Yu,<sup>b</sup> Huajie Feng,<sup>\*a</sup> and Xihong Lu<sup>c</sup>

<sup>a</sup> Key Laboratory of Electrochemical Energy Storage and Energy Conversion of Hainan Province, Hainan Normal University, Haikou 571158, Hainan, China

<sup>b</sup> Guangdong Industry Polytechnic University, Guangzhou 510300, Guangdong, China

<sup>c</sup> MOE of the Key Laboratory of Bioinorganic and Synthetic Chemistry, KLGHEI of Environment and Energy Chemistry, School of Chemistry, Sun Yat-Sen University, Guangzhou 510275, Guangdong, China

**\*Corresponding Author.**

*E-mail:* qiuwd3@mail3.sysu.edu.cn (W.D. Qiu), Fenghuajiehk@163.com (H.J. Feng)

<sup>‡</sup>Yize Wang and Wenda Qiu contributed equally to this work.

#### Calculations:

Specific capacities ( $C_{cell-s}$ ) of half-cells and PIHCs devices were estimated from the discharge curve using the following equations:

$$C_{cell-s} = \frac{\int_0^{\Delta t} I \times dt}{m}$$

(1)

where  $C_{cell-s}$  (mA h g<sup>-1</sup>) is the specific capacity of the half-cells and PIHCs devices,  $I$  (mA) is the applied discharging current,  $\Delta t$  (h) is the discharging time and  $m$  (g) is the mass of the active material.

Specific energy density  $E$  and specific power density  $P$  of PIHCs devices were obtained from the following equations:

$$E = C_{cell-s} * \Delta V \quad (2)$$

$$P = \frac{C_{cell-s} * \Delta V}{\Delta t}$$

(3)

where  $E$  (Wh kg<sup>-1</sup>) is the energy density,  $C_{cell-s}$  is the specific capacity obtained from Equation (1) and  $\Delta V$  (V) is the voltage window.  $P$  (W kg<sup>-1</sup>) is the specific power density and  $\Delta t$  (h) is the discharging time.

The chemical diffusion coefficient of k<sup>+</sup> can be calculated based on the following equation:

$$D_{GITT} = \frac{4}{\pi\tau} \left( \frac{n_m V_m}{S} \right)^2 \left( \frac{\Delta E_s}{\Delta E_t} \right)^2 \quad (4)$$

Here,  $\tau$  (s) is the duration of the current pulse;  $n_m$  (mol) is the number of moles;  $V_m$  (cm<sup>3</sup> mol<sup>-1</sup>) is the molar volume of the electrode;  $S$  (cm<sup>2</sup>) is the electrode/electrolyte contact area;  $\Delta E_s$  is the steady state voltage change due to the current pulse, and  $\Delta E_t$  is the voltage change during the constant current pulse, eliminating the  $iR$  drop.

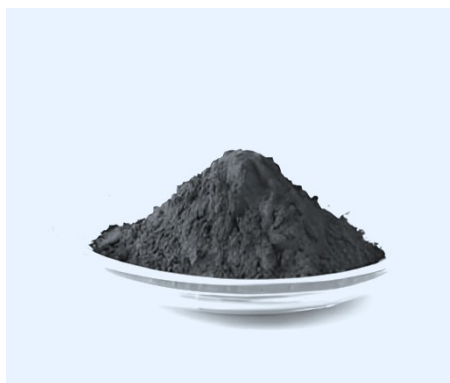

**Figure S1.** NP-3DPG powder on an evaporating dish.

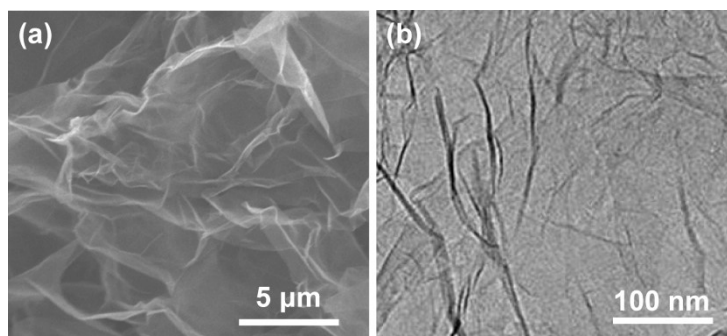

**Figure S2.** (a) SEM and (b) TEM of GO.

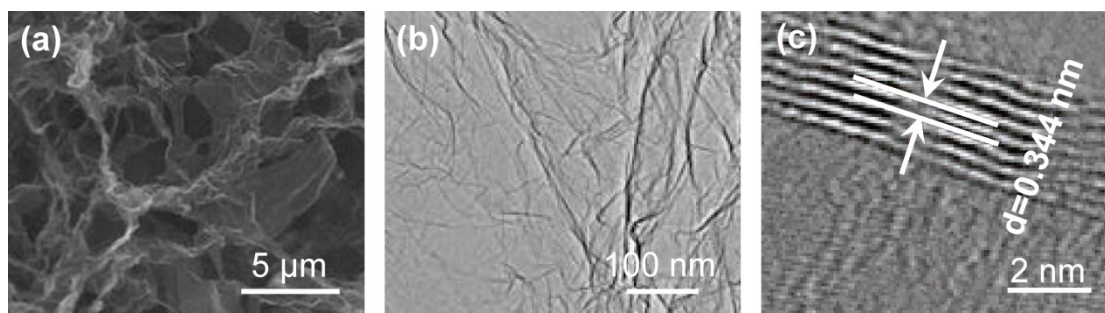

**Figure S3.** (a) SEM, (b) TEM, and (C) HRTEM of N-3DPG.

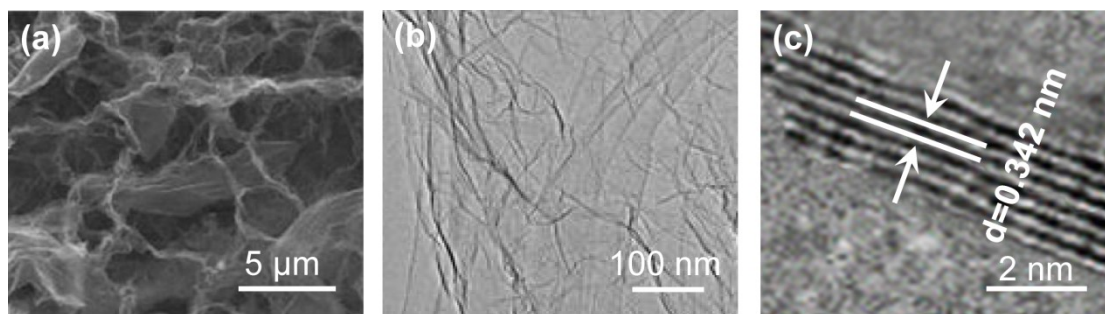

**Figure S4.** (a) SEM, (b) TEM, and (c) HRTEM of 3DPG.

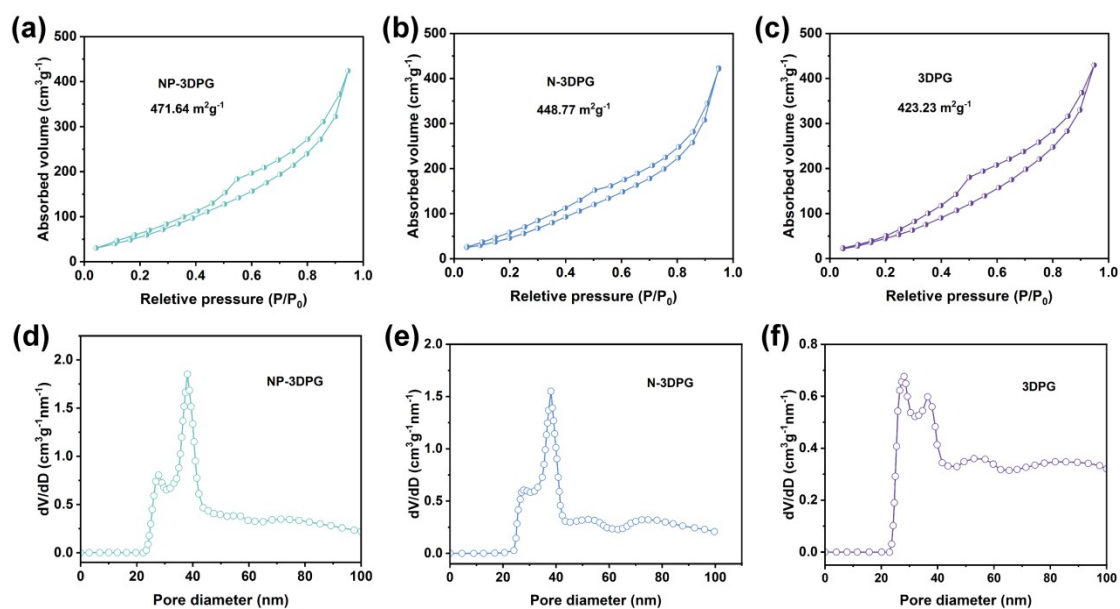

**Figure S5.** Nitrogen adsorption–desorption isotherm of (a) NP-3DPG, (b) N-3DPG, and (c) 3DPG. Pore size distribution of (d) NP-3DPG, (e) N-3DPG, and (f) 3DPG.

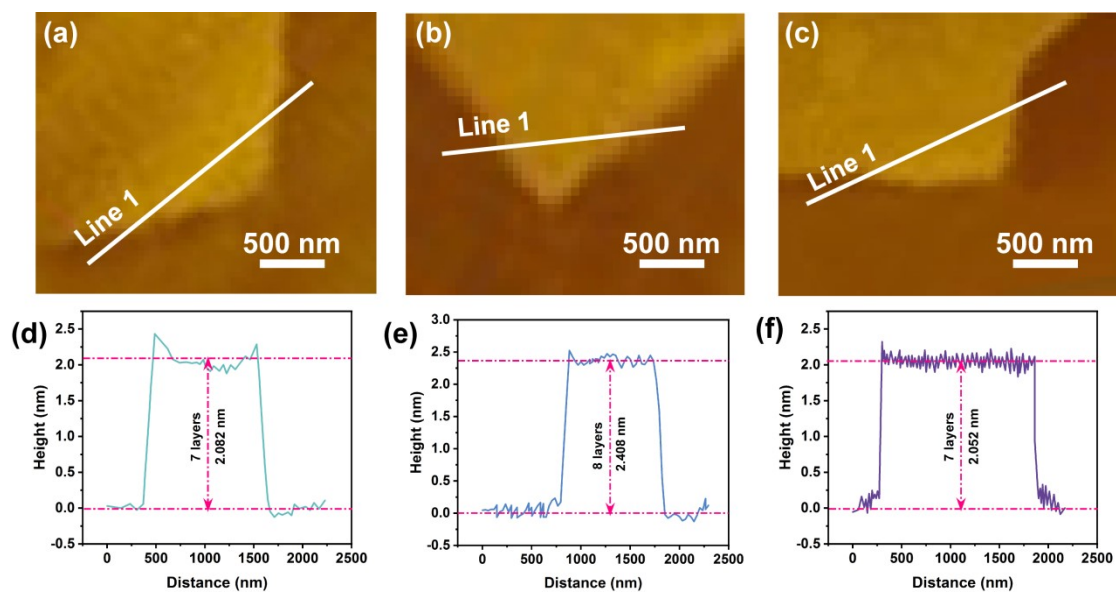

**Figure S6.** AFM images of (a) NP-3DPG, (a) N-3DPG, and (c) 3DPG. Height profiles of (d) NP-3DPG, (e) N-3DPG, and (f) 3DPG.

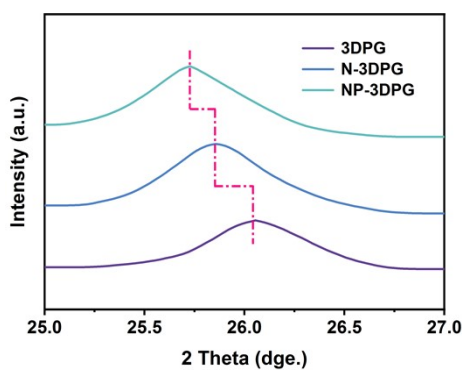

**Figure S7.** Partial enlarged XRD patterns of 3DPG, N-3DPG and NP-3DPG.

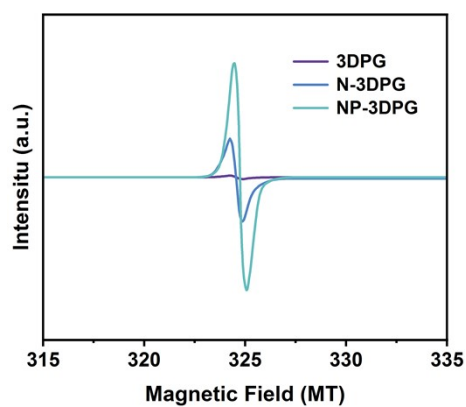

**Figure S8.** EPR spectra of NP-3DPG, N-3DPG and 3DPG.

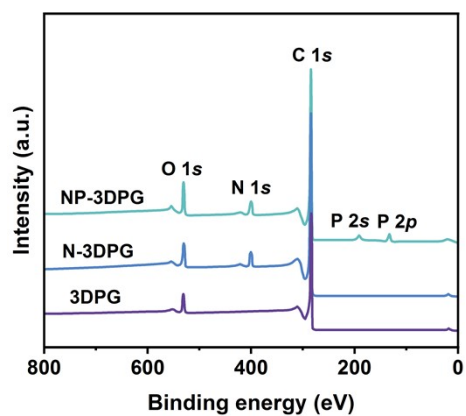

**Figure S9.** XPS survey spectrum of 3DPG, N-3DPG, and NP-3DPG.

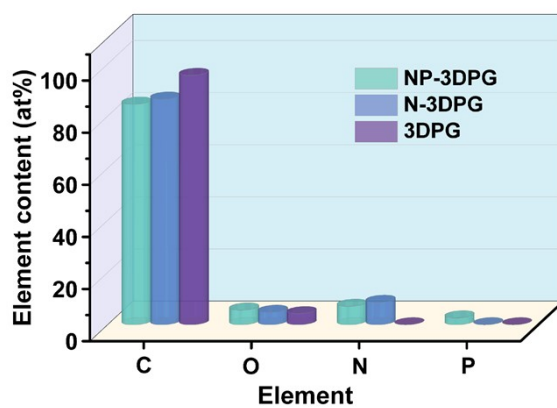

**Figure S10.** Element content of 3DPG, N-3DPG, and NP-3DPG.

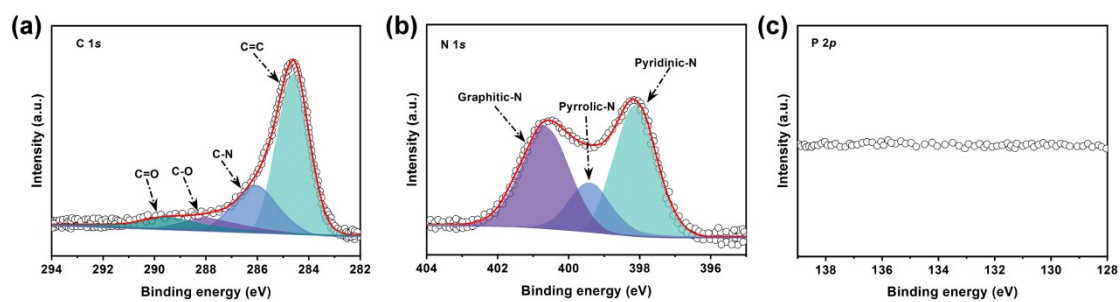

**Figure S11.** (a) C 1s, (b) N 1s, and (c) P 2p high-resolution XPS of N-3DPG.

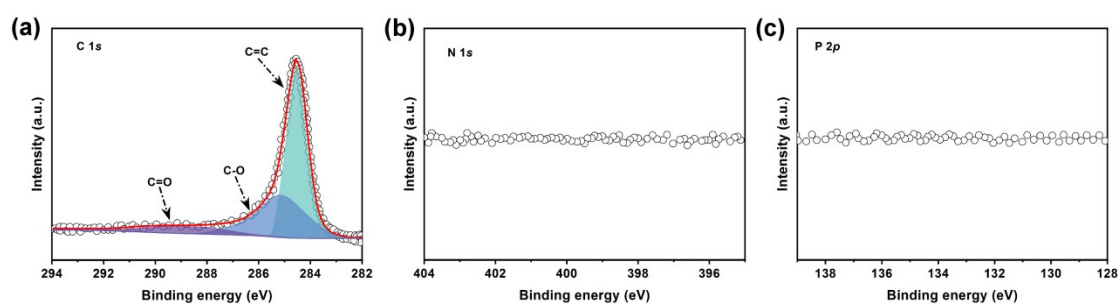

**Figure S12.** (a) C 1s, (b) N 1s, and (c) P 2p high-resolution XPS of 3DPG.

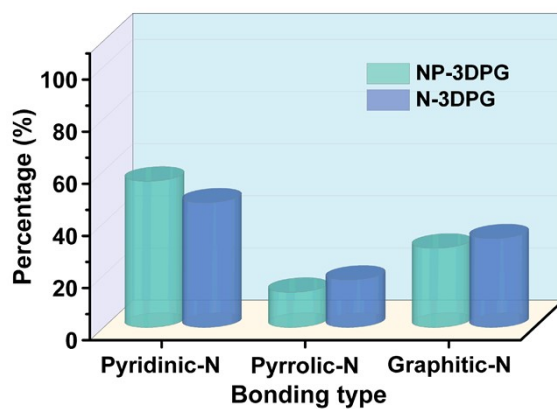

**Figure S13.** Percentage contents of nitrogen species in the N-3DPG and NP-3DPG.

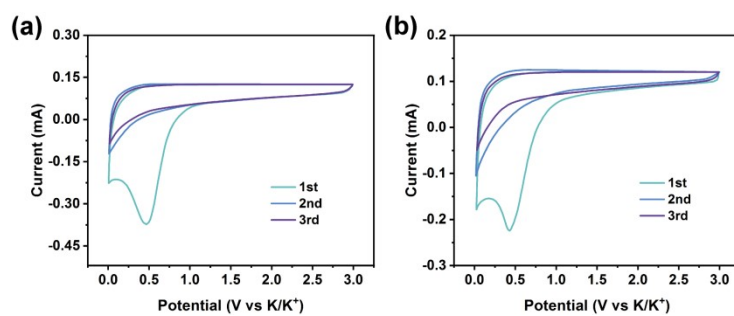

**Figure S14.** CV curves of (a) N-3DPG and (b) 3DPG electrode.

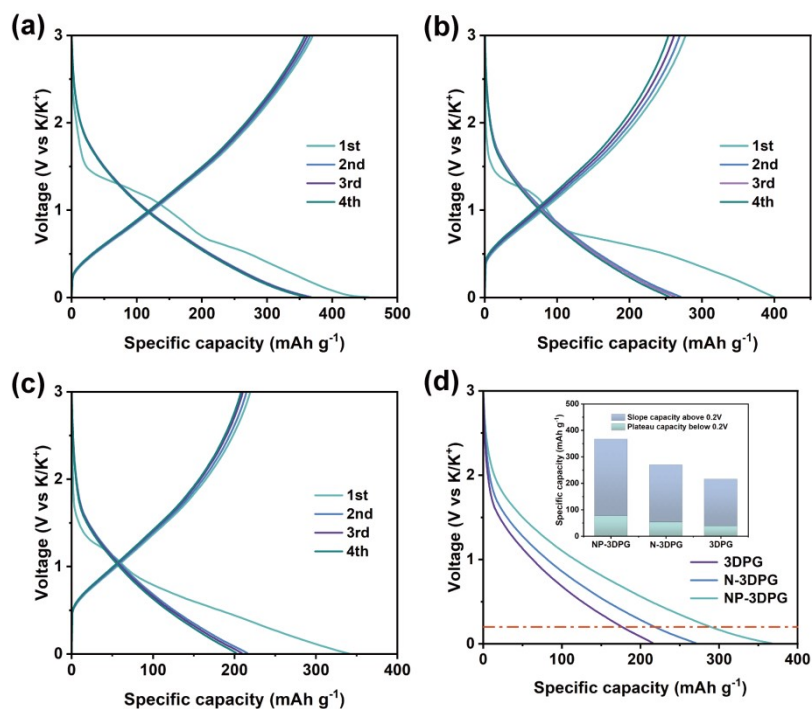

**Figure S15.** GCD profiles of the (a) NP-3DPG, (b) N-3DPG and (c) 3DPG electrodes at  $0.2 \text{ A g}^{-1}$ . (d) The discharge profiles of NP-3DPG, N-3DPG and 3DPG at second cycle (inset: the capacity contribution at each stage).



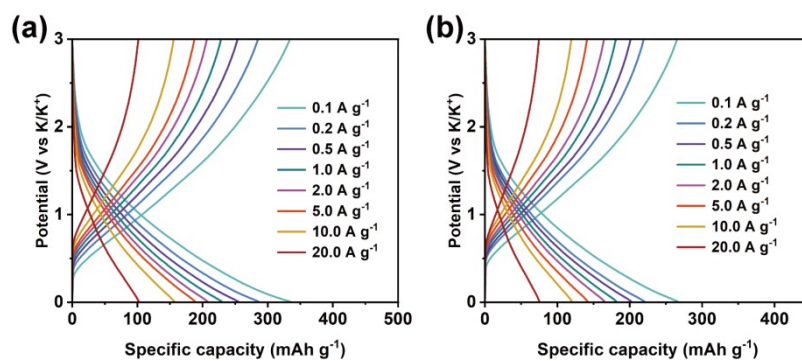

**Figure S16.** GCD curves at various current densities for (a) N-3DPG and (b) 3DPG.

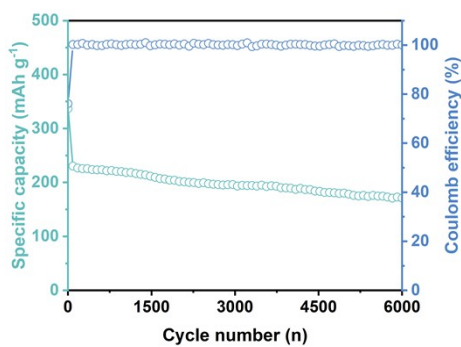

**Figure S17.** Long-term cycling performance of the NP-3DG at 5.0 A g<sup>-1</sup>.

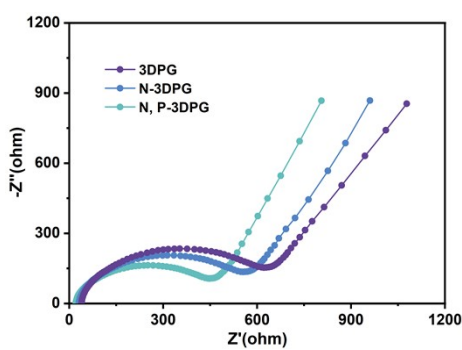

**Figure S18.** Electrochemical impedance spectra (EIS) of the 3DPG, N-3DPG and NP-3DPG electrodes.

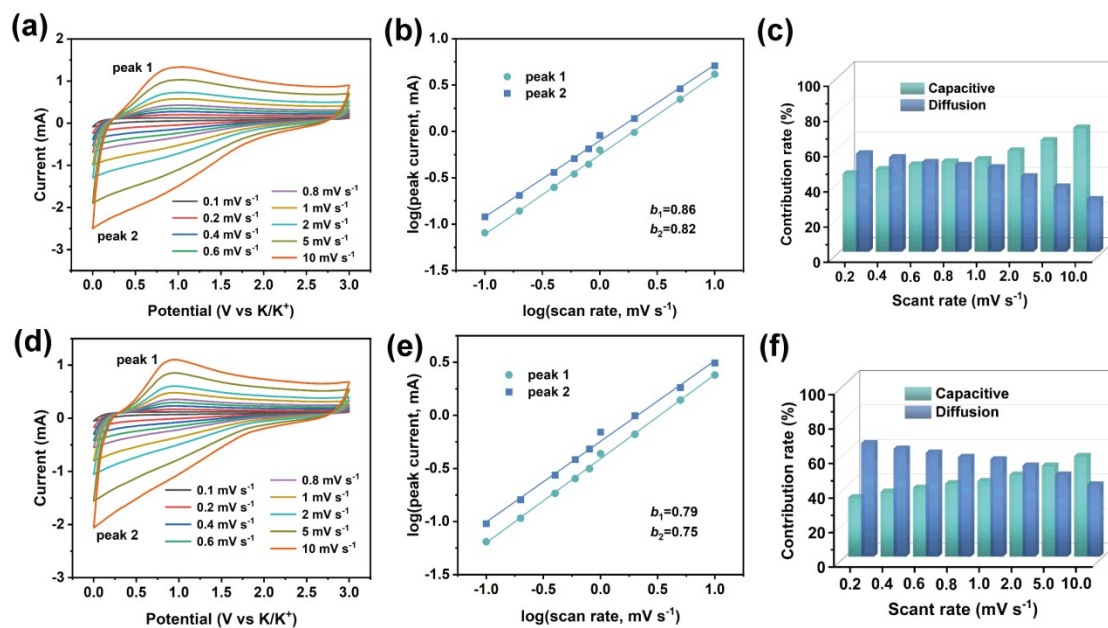

**Figure S19.** CV curves of (a) N-3DPG and (d) 3DPG.  $b$ -value of (b) N-3DPG and (e) 3DPG. Diffusive and capacitive contributions of (c) N-3DPG and (f) 3DPG.

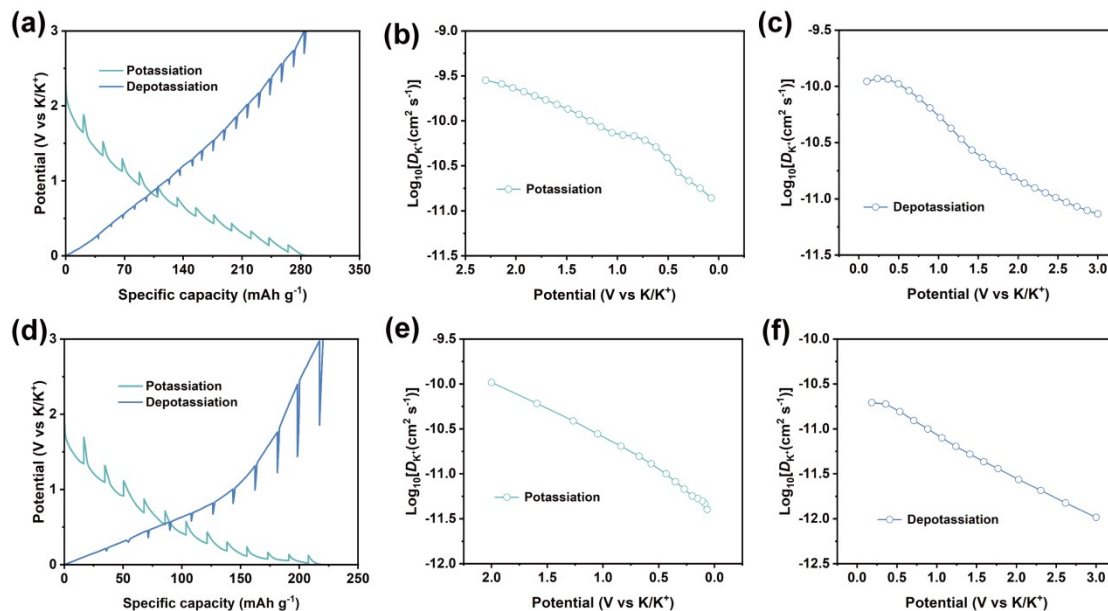

**Figure S20.** GITT profiles of (a) N-3DPG and (d) 3DPG; Potassiation  $D_k$  of (b) N-3DPG and (e) 3DPG; and depotassiation  $D_k$  of (c) N-3DPG and (f) 3DPG.

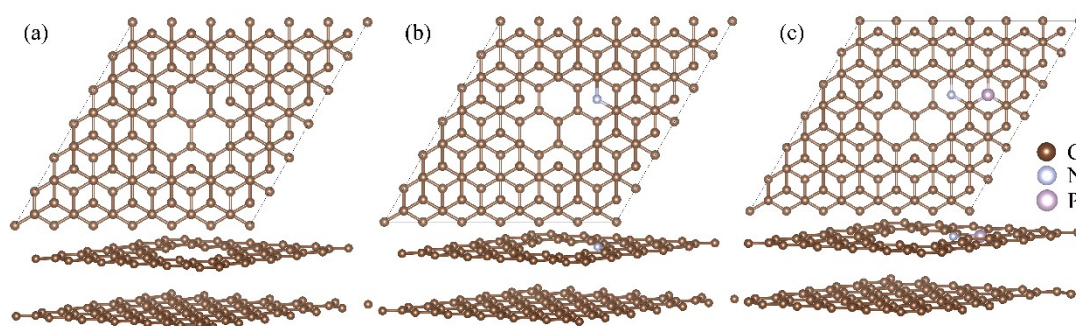

**Figure S21.** Top and side view of the optimized structure of (a) 3DPG, (b) N-3DPG and (c) NP-3DPG.

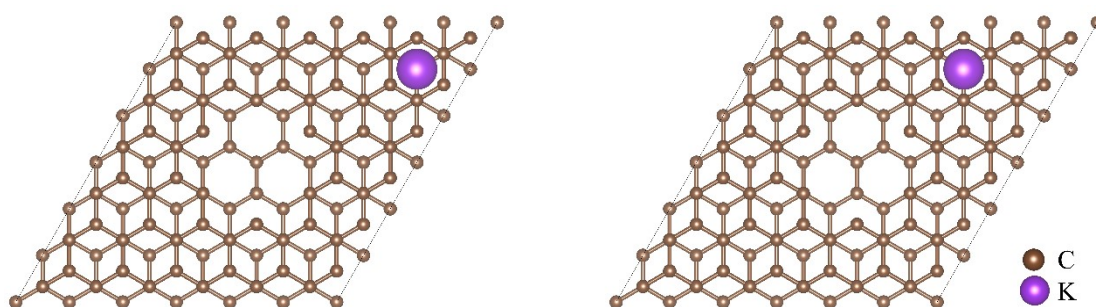

**Figure S22.** Illustration of the K ion diffusion path from one hollow position to the nearest hollow position in 3DPG.

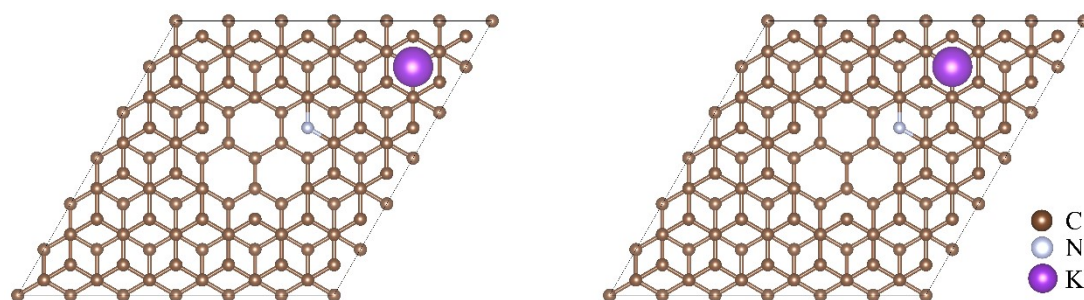

**Figure S23.** Illustration of the K ion diffusion path from one hollow position to the nearest hollow position in N-3DPG.

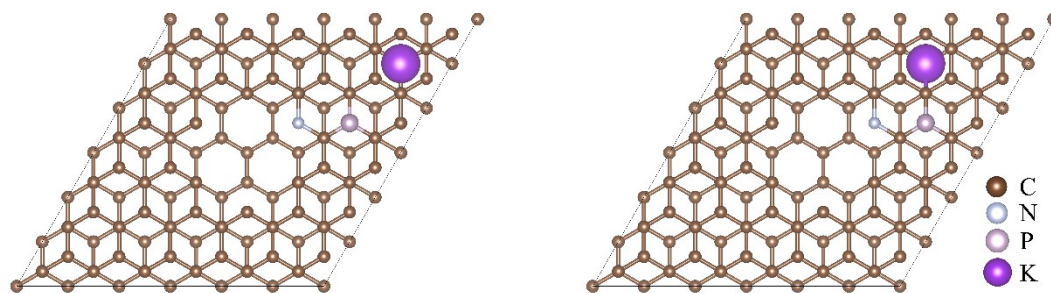

**Figure S24.** Illustration of the K ion diffusion path from one hollow position to the nearest hollow position in NP-3DPG.

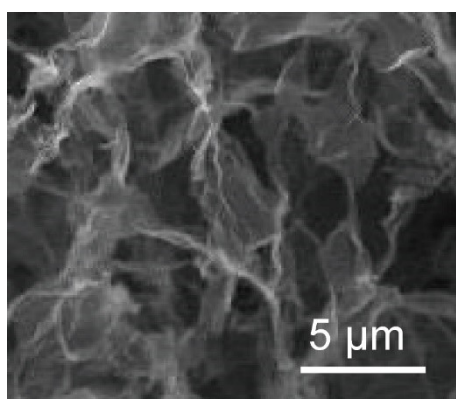

**Figure S25.** SEM of ANP-3DPG.



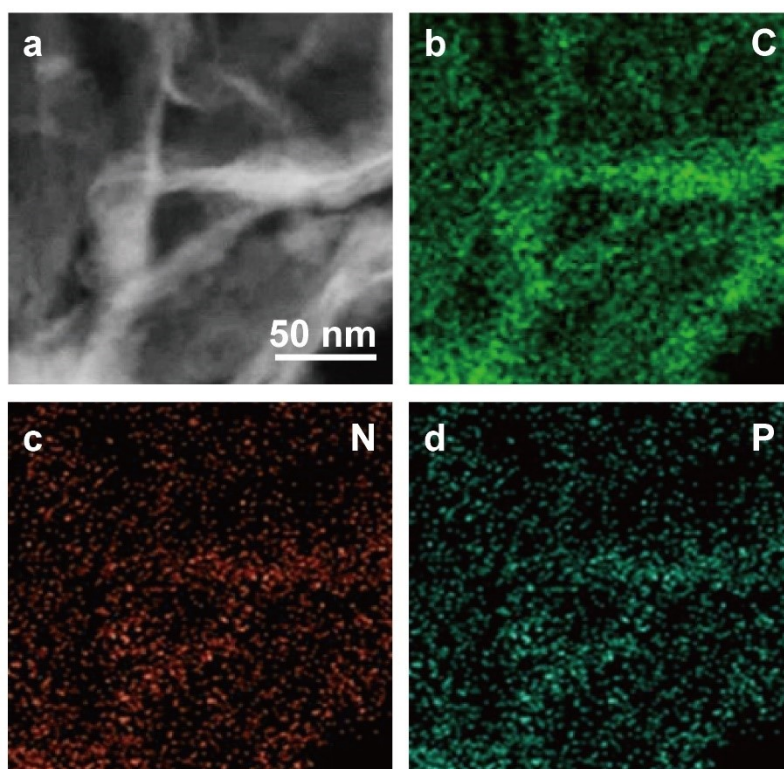

**Figure S26.** (a) STEM image, (b) C, (c) N, and (d) P elemental mapping of ANP-3DPG.

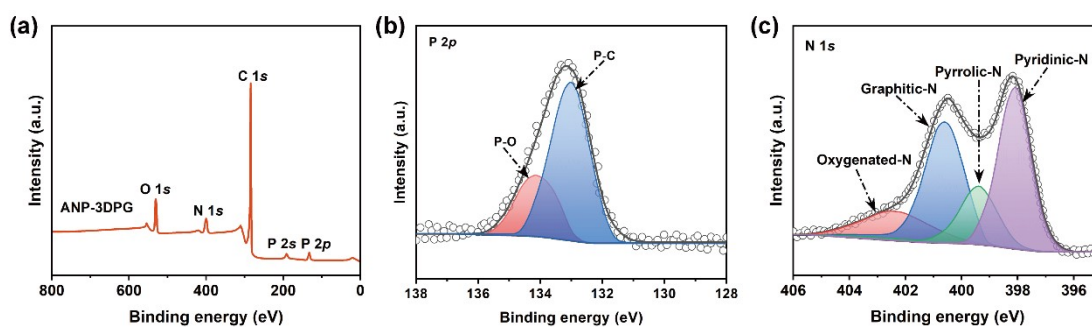

**Figure S27.** (a) The survey XPS spectrum, (b) high-resolution P 2p spectra, (c) high-resolution N 1s spectra of ANP-3DPG.

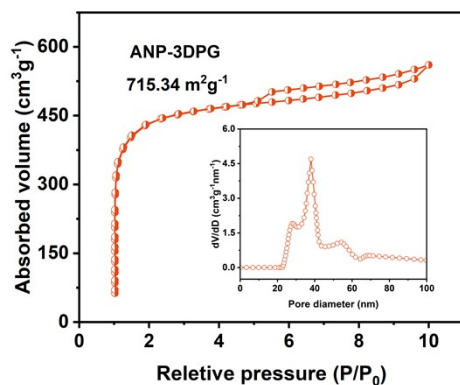

**Figure S28.** Nitrogen adsorption–desorption isotherm of ANP-3DPG.

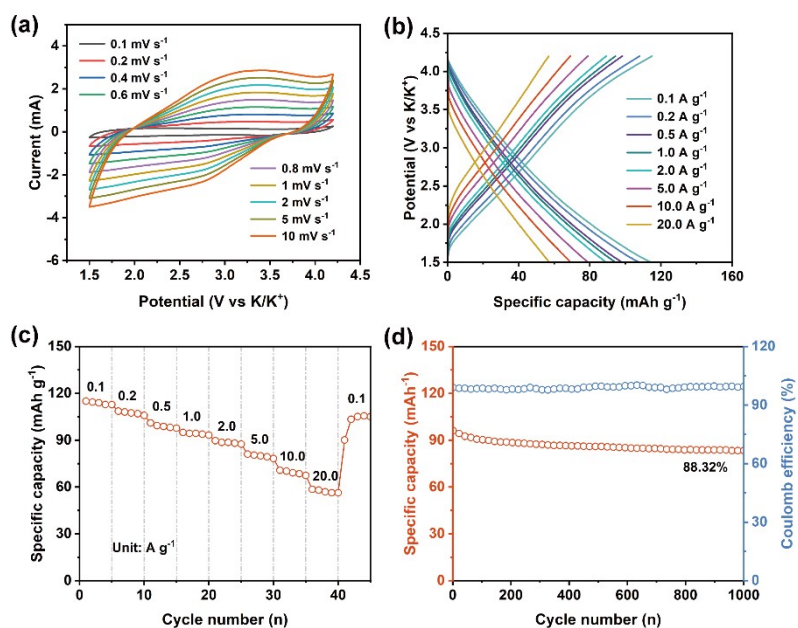

**Figure S29.** Electrochemical performances of the ANP-3DPG cathode in K-half cells.

(a) CV curves at different scan rates, (b) charge/discharge curves at various current densities, (c) rate property, and (g) cycling performance at 1.0 A g<sup>-1</sup>.

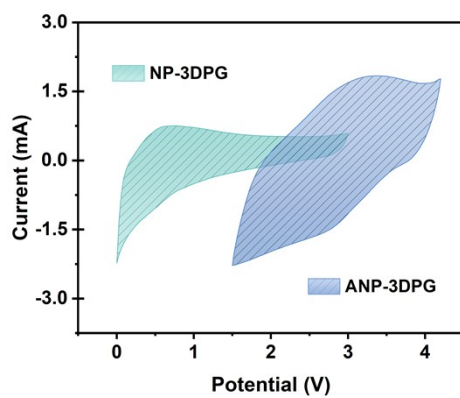

**Figure S30.** CV curves of the NP-3DPG and the ANP-3DPG electrodes in half cells at  $1 \text{ mV s}^{-1}$ .

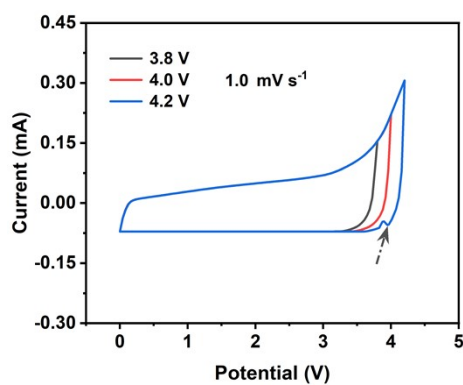

**Figure S31.** CV curves of ANP-3DPG//NP-3DPG PIHCs device in different potential windows at a scan rate of  $1.0 \text{ mV s}^{-1}$ .

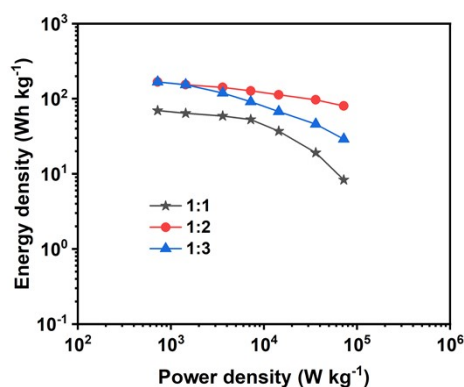

**Figure S32.** Ragone plots of NP-3DPG//ANP-3DPG PIHCs device with different mass ratios of anode to cathode.

**Table S1.** Comparison of the initial coulombic efficiency of the carbonaceous electrodes for PIBs with our work.

| Materials                                                   | Current density<br>(A g <sup>-1</sup> ) | Initial coulombic<br>efficiency | Reference |
|-------------------------------------------------------------|-----------------------------------------|---------------------------------|-----------|
| NP-3DPG                                                     | 0.2                                     | 81.4%                           | This work |
| PN-HPCNF                                                    | 0.2                                     | 78.9%                           | [1]       |
| PDDA-NPCNs/Ti <sub>3</sub> C <sub>2</sub>                   | 0.1                                     | 73.2%                           | [2]       |
| nitrogen/oxygen codoped<br>carbon hollow multihole<br>bowls | 0.1                                     | 63.3%                           | [3]       |
| oxygen/fluorine<br>dualdoped porous<br>carbon               | 0.1                                     | 63%                             | [4]       |



|                                                                          |       |        |      |
|--------------------------------------------------------------------------|-------|--------|------|
| S/O codoped porous<br>carbon microspheres                                | 0.05  | 61.7%  | [5]  |
| mesoporous graphitic<br>carbon nanospring                                | 0.05  | 61.2%  | [6]  |
| P-doped N-rich<br>honeycomb-like carbon                                  | 0.2   | 56.9%  | [7]  |
| Sulfur-grafted hollow<br>carbon spheres                                  | 0.025 | 51.4%  | [8]  |
| N-doped carbon<br>nanofibers-650                                         | 0.025 | 49%    | [9]  |
| N/O dual-doped carbon<br>network                                         | 0.05  | 47.12% | [10] |
| P-doped hard carbon                                                      | 0.1   | 45.7%  | [11] |
| rGO aerogel                                                              | 0.1   | 44%    | [12] |
| nitrogen-doped porous<br>carbon                                          | 0.1   | 43.1%  | [13] |
| graphitic carbon nanocage                                                | 0.05  | 40%    | [14] |
| carbon nanosheets750                                                     | 0.05  | 38%    | [15] |
| nitrogen/oxygen in situ<br>dual-doped hierarchical<br>porous hard carbon | 0.05  | 25%    | [16] |
| S/N@C                                                                    | 0.05  | 24.6%  | [17] |

|                                                    |      |       |      |
|----------------------------------------------------|------|-------|------|
| three-dimensional<br>nitrogen-doped framework      | 0.1  | 24.3% | [18] |
| carbon<br>NHC <sub>2</sub> -NH <sub>3</sub> /Ar    | 0.1  | 15.8% | [19] |
| Hierarchical carbon<br>nanotube-S4                 | 0.1  | 15%   | [20] |
| pyridinic N-contentdoped<br>porous carbon monolith | 0.02 | 10%   | [21] |

**Table S2.** Potassium storage performance of NP-3DPG compared with previously reported materials.

| Materials                                                         | Rate capacity                                           | Cycling stability                                                         | Ref.      |
|-------------------------------------------------------------------|---------------------------------------------------------|---------------------------------------------------------------------------|-----------|
| NP-3DPG                                                           | 429.5 mA h g <sup>-1</sup> at<br>20.0 A g <sup>-1</sup> | 236.5 mA h g <sup>-1</sup> after 15000<br>cycles at 5.0 A g <sup>-1</sup> | This work |
| Nitrogen doped<br>cup-stacked carbon<br>tubes                     | 75 mA h g <sup>-1</sup> at 1 A<br>g <sup>-1</sup>       | 236 mA h g <sup>-1</sup> after 100<br>cycles at 0.02 A g <sup>-1</sup>    | [22]      |
| High pyridine N-<br>doped porous<br>carbon                        | 182.6 mAh g <sup>-1</sup> at 2<br>A g <sup>-1</sup>     | 231.6 mAh g <sup>-1</sup> after 200<br>cycles at 0.5 A g <sup>-1</sup>    | [23]      |
| Co <sub>3</sub> O <sub>4</sub> -Fe <sub>2</sub> O <sub>3</sub> /C | 278 mAh g <sup>-1</sup> at 1 A                          | 220 mAh g <sup>-1</sup> after 50 cycles                                   | [24]      |

|                                                   | $\text{g}^{-1}$                                     | at $0.05 \text{ A g}^{-1}$                                             |      |
|---------------------------------------------------|-----------------------------------------------------|------------------------------------------------------------------------|------|
| Hyperporous carbon sponge                         | $180 \text{ mAh g}^{-1}$ at $1.6 \text{ A g}^{-1}$  | $210 \text{ mAh g}^{-1}$ after 500 cycles at $1 \text{ A g}^{-1}$      | [20] |
| Nitrogen-doped bamboo-like carbon nanotubes       | $186 \text{ mAh g}^{-1}$ at $1 \text{ A g}^{-1}$    | $204 \text{ mAh g}^{-1}$ after 1000 cycles at $0.5 \text{ A g}^{-1}$   | [25] |
| Chemically activated hollow carbon nanospheres    | $137 \text{ mA h g}^{-1}$ at $4 \text{ A g}^{-1}$   | $192.7 \text{ mAh g}^{-1}$ after 5000 cycles at $2 \text{ A g}^{-1}$   | [26] |
| Sulfur/nitrogen codoped carbon nanofiber agerogel | $168 \text{ mA h g}^{-1}$ at $2 \text{ A g}^{-1}$   | $168 \text{ mA h g}^{-1}$ after 1000 cycles at $2 \text{ A g}^{-1}$    | [27] |
| Hollow carbon architecture                        | $110 \text{ mAh g}^{-1}$ at $0.56 \text{ A g}^{-1}$ | $150 \text{ mA h g}^{-1}$ after 500 cycles at $0.279 \text{ A g}^{-1}$ | [28] |
| Nitrogen doped carbon nanofibers                  | $153 \text{ mA h g}^{-1}$ at $2 \text{ A g}^{-1}$   | $146 \text{ mA h g}^{-1}$ after 4000 cycles at $2 \text{ A g}^{-1}$    | [9]  |
| S-NC                                              | $72 \text{ mA h g}^{-1}$ at $10 \text{ A g}^{-1}$   | $140 \text{ mA h g}^{-1}$ after 3000 cycles at $2 \text{ A g}^{-1}$    | [29] |
| 3D nitrogen-doped framework carbon                | $111 \text{ mA h g}^{-1}$ at $10 \text{ A g}^{-1}$  | $137 \text{ mA h g}^{-1}$ after 1000 cycles at $2 \text{ A g}^{-1}$    | [18] |
| N-doped carbon                                    | $102.6 \text{ mA h g}^{-1}$ at $2 \text{ A g}^{-1}$ | $119.9 \text{ mA h g}^{-1}$ after 1000 cycles at $1 \text{ A g}^{-1}$  | [30] |

|                   |                                |                                       |      |
|-------------------|--------------------------------|---------------------------------------|------|
| Oxygen-Rich       | 133 mA h g <sup>-1</sup> at 10 | 111 mA h g <sup>-1</sup> after 3000   | [15] |
| Carbon Nanosheets | A g <sup>-1</sup>              | cycles at 5 A g <sup>-1</sup>         |      |
| Onion-like carbon | 78 mA h g <sup>-1</sup> at 10  | 111 mA h g <sup>-1</sup> after 1000   | [31] |
|                   | A g <sup>-1</sup>              | cycles at 2 A g <sup>-1</sup>         |      |
| Sulfur/oxygen     | 158 mAh g <sup>-1</sup> at 1 A | 108.4 mA h g <sup>-1</sup> after 2000 | [5]  |
| co-doped hard     | g <sup>-1</sup>                | cycles at 1 A g <sup>-1</sup>         |      |
| carbon            |                                |                                       |      |
| Nitrogen-doped    | 102 mA h g <sup>-1</sup> at 2  | 102 mA h g <sup>-1</sup> after 500    | [32] |
| carbon nanotubes  | A g <sup>-1</sup>              | cycles at 2 A g <sup>-1</sup>         |      |
| Hierarchically    | 64 mA h g <sup>-1</sup> at 4 A | 65 mA h g <sup>-1</sup> after 900     | [17] |
| Porous Thin       | g <sup>-1</sup>                | cycles at 2 A g <sup>-1</sup>         |      |
| Carbon Shells     |                                |                                       |      |

**Table S3.** The comparison between NP-3DPG//ANP-3DPG PIHCs and other recently reported carbonaceous based PIHCs.

| Devices      | Maximum                                                                         | Maximum                                                                         | Cycles                                                        | Ref. |
|--------------|---------------------------------------------------------------------------------|---------------------------------------------------------------------------------|---------------------------------------------------------------|------|
|              | Energy density<br>(Wh kg <sup>-1</sup> )/Power<br>density (W kg <sup>-1</sup> ) | Power density<br>(W kg <sup>-1</sup> )/Energy<br>density (Wh kg <sup>-1</sup> ) | /Capacity<br>retention<br>(%)/current<br>(A g <sup>-1</sup> ) |      |
| MoP@NC-1//AC | 69.7/100                                                                        | 2041.6/20                                                                       | 800/89.9/0.1                                                  | [33] |

|                                |             |              |                |              |
|--------------------------------|-------------|--------------|----------------|--------------|
| CTP@C//AC                      | 80/32       | 5144/34      | 1000/75.9/5    | [34]         |
| NOHPC//HPAC                    | 90.1/939.6  | 6217.5/52.93 | 6000/87.2/2    | [35]         |
| BSH//AC                        | 94/188      | 599/13.3     | 1000/71.4/0.34 | [36]         |
| PNC//HPC                       | 103/97.9    | 6106.2/44.1  | 5000/64/1      | [37]         |
| WS <sub>2</sub> @NCNs//NCHS    | 103.4/235   | 2300/60      | 500/78/0.5     | [38]         |
| NHCS//ANHCS                    | 114.2/100.5 | 8203/19.1    | 5000/80.4/2    | [39]         |
| NCNT//AC                       | 115/116.8   | 1713.4/25.7  | 2000/81.6/1    | [40]         |
| N-MoSe <sub>2</sub> /G//AC     | 119/39.6    | 7212/29      | 3000/75.2/1    | [41]         |
| N,S-3DHPC-600//AC-800          | 130.6/210   | 16800/56     | 5000/86.8/5    | [42]         |
| NbSe <sub>2</sub> /NSeCNFs//AC | 133/180     | 4000/18      | 10000/83/2     | [43]         |
| SHPNC//AC                      | 135/112.6   | ~4000/20     | 3750/75.4/1    | [44]         |
| PN-PanC//PN-PanC               | 155.9/76.1  | 11309.1/22.0 | 40000/77/1     | [45]         |
| M-NC/ANC                       | 157/37      | 2300/49      | 3000/80//0.5   | [46]         |
| P/O-PCS//AC                    | 158/223     | 1380/11      | 30000/94.5/5   | [47]         |
| 3DNFC//3DNFAC                  | 163.5/210   | 21000/76.4   | 10000/91.7/2   | [18]         |
| NP-3DPG//ANP-3DPG              | 167.4/720   | 72000/80.2   | 10000/87.3/2   | This<br>work |

## References

- [1] X. Hu, G. Zhong, J. Li, Y. Liu, J. Yuan, J. Chen, H. Zhan, Z. Wen, Hierarchical porous carbon nanofibers for compatible anode and cathode of potassium-ion hybrid capacitor, *Energy & Environmental Science*, 13 (2020) 2431-2440.
- [2] R. Zhao, H. Di, X. Hui, D. Zhao, R. Wang, C. Wang, L. Yin, Self-assembled Ti<sub>3</sub>C<sub>2</sub> MXene and N-rich porous carbon hybrids as superior anodes for high-performance potassium-ion batteries, *Energy & Environmental Science*, 13 (2020) 246-257.
- [3] Z. Zhang, B. Jia, L. Liu, Y. Zhao, H. Wu, M. Qin, K. Han, W.A. Wang, K. Xi, L. Zhang, Hollow multihole carbon bowls: A stress-release structure design for high-stability and high-volumetric-capacity potassium-ion batteries, *ACS nano*, 13 (2019) 11363-11371.
- [4] J. Lu, C. Wang, H. Yu, S. Gong, G. Xia, P. Jiang, P. Xu, K. Yang, Q. Chen, Oxygen/fluorine dual-doped porous carbon nanopolyhedra enabled ultrafast and highly stable potassium storage, *Advanced Functional Materials*, 29 (2019) 1906126.
- [5] M. Chen, W. Wang, X. Liang, S. Gong, J. Liu, Q. Wang, S. Guo, H. Yang, Sulfur/oxygen codoped porous hard carbon microspheres for high-performance potassium-ion batteries, *Advanced Energy Materials*, 8 (2018) 1800171.
- [6] Y. Qian, S. Jiang, Y. Li, Z. Yi, J. Zhou, J. Tian, N. Lin, Y. Qian, Water-induced growth of a highly oriented mesoporous graphitic carbon nanospring for fast potassium-ion adsorption/intercalation storage, *Angewandte Chemie International Edition*, 58 (2019) 18108-18115.

- [7] H. He, D. Huang, Y. Tang, Q. Wang, X. Ji, H. Wang, Z. Guo, Tuning nitrogen species in three-dimensional porous carbon via phosphorus doping for ultra-fast potassium storage, *Nano Energy*, 57 (2019) 728-736.
- [8] J. Ding, H. Zhang, H. Zhou, J. Feng, X. Zheng, C. Zhong, E. Paek, W. Hu, D. Mitlin, Sulfur-grafted hollow carbon spheres for potassium-ion battery anodes, *Advanced Materials*, 31 (2019) 1900429.
- [9] Y. Xu, C. Zhang, M. Zhou, Q. Fu, C. Zhao, M. Wu, Y. Lei, Highly nitrogen doped carbon nanofibers with superior rate capability and cyclability for potassium ion batteries, *Nature communications*, 9 (2018) 1720.
- [10] J. Ruan, Y. Zhao, S. Luo, T. Yuan, J. Yang, D. Sun, S. Zheng, Fast and stable potassium-ion storage achieved by in situ molecular self-assembling N/O dual-doped carbon network, *Energy Storage Materials*, 23 (2019) 46-54.
- [11] Y. Qian, S. Jiang, Y. Li, Z. Yi, J. Zhou, T. Li, Y. Han, Y. Wang, J. Tian, N. Lin, In Situ Revealing the Electroactivity of P–O and P–C Bonds in Hard Carbon for High-Capacity and Long-Life Li/K-Ion Batteries, *Advanced Energy Materials*, 9 (2019) 1901676.
- [12] L. Liu, Z. Lin, J.-Y. Chane-Ching, H. Shao, P.-L. Taberna, P. Simon, 3D rGO aerogel with superior electrochemical performance for K–Ion battery, *Energy Storage Materials*, 19 (2019) 306-313.
- [13] D. Li, X. Ren, Q. Ai, Q. Sun, L. Zhu, Y. Liu, Z. Liang, R. Peng, P. Si, J. Lou, Facile fabrication of nitrogen-doped porous carbon as superior anode material for potassium-ion batteries, *Advanced Energy Materials*, 8 (2018) 1802386.

- [14] B. Cao, Q. Zhang, H. Liu, B. Xu, S. Zhang, T. Zhou, J. Mao, W.K. Pang, Z. Guo, A. Li, Graphitic carbon nanocage as a stable and high power anode for potassium-ion batteries, *Advanced Energy Materials*, 8 (2018) 1801149.
- [15] J. Chen, B. Yang, H. Hou, H. Li, L. Liu, L. Zhang, X. Yan, Disordered, large interlayer spacing, and oxygen-rich carbon nanosheets for potassium ion hybrid capacitor, *Advanced Energy Materials*, 9 (2019) 1803894.
- [16] J. Yang, Z. Ju, Y. Jiang, Z. Xing, B. Xi, J. Feng, S. Xiong, Enhanced capacity and rate capability of nitrogen/oxygen dual-doped hard carbon in capacitive potassium-ion storage, *Advanced Materials*, 30 (2018) 1700104.
- [17] A. Mahmood, S. Li, Z. Ali, H. Tabassum, B. Zhu, Z. Liang, W. Meng, W. Aftab, W. Guo, H. Zhang, Ultrafast sodium/potassium-ion intercalation into hierarchically porous thin carbon shells, *Advanced Materials*, 31 (2019) 1805430.
- [18] B. Yang, J. Chen, L. Liu, P. Ma, B. Liu, J. Lang, Y. Tang, X. Yan, 3D nitrogen-doped framework carbon for high-performance potassium ion hybrid capacitor, *Energy Storage Materials*, 23 (2019) 522-529.
- [19] W. Yang, J. Zhou, S. Wang, W. Zhang, Z. Wang, F. Lv, K. Wang, Q. Sun, S. Guo, Freestanding film made by necklace-like N-doped hollow carbon with hierarchical pores for high-performance potassium-ion storage, *Energy & Environmental Science*, 12 (2019) 1605-1612.
- [20] Y. Wang, Z. Wang, Y. Chen, H. Zhang, M. Yousaf, H. Wu, M. Zou, A. Cao, R.P. Han, Hyperporous sponge interconnected by hierarchical carbon nanotubes as a high-performance potassium-ion battery anode, *Advanced Materials*, 30 (2018)



1802074.

[21] Y. Xie, Y. Chen, L. Liu, P. Tao, M. Fan, N. Xu, X. Shen, C. Yan, Ultra-high pyridinic N-doped porous carbon monolith enabling high-capacity K-ion battery anodes for both half-cell and full-cell applications, *Advanced Materials*, 29 (2017) 1702268.

[22] X. Zhao, Y. Tang, C. Ni, J. Wang, A. Star, Y. Xu, Free-standing nitrogen-doped cup-stacked carbon nanotube mats for potassium-ion battery anodes, *ACS Applied Energy Materials*, 1 (2018) 1703-1707.

[23] Y. Li, C. Yang, F. Zheng, X. Ou, Q. Pan, Y. Liu, G. Wang, High pyridine N-doped porous carbon derived from metal–organic frameworks for boosting potassium-ion storage, *Journal of Materials Chemistry A*, 6 (2018) 17959-17966.

[24] I. Sultana, M.M. Rahman, S. Mateti, V.G. Ahmadabadi, A.M. Glushenkov, Y. Chen, K-ion and Na-ion storage performances of  $\text{Co}_3\text{O}_4\text{-Fe}_2\text{O}_3$  nanoparticle-decorated super P carbon black prepared by a ball milling process, *Nanoscale*, 9 (2017) 3646-3654.

[25] Y. Liu, C. Yang, Q. Pan, Y. Li, G. Wang, X. Ou, F. Zheng, X. Xiong, M. Liu, Q. Zhang, Nitrogen-doped bamboo-like carbon nanotubes as anode material for high performance potassium ion batteries, *Journal of Materials Chemistry A*, 6 (2018) 15162-15169.

[26] G. Wang, X. Xiong, D. Xie, Z. Lin, J. Zheng, F. Zheng, Y. Li, Y. Liu, C. Yang, M. Liu, Chemically activated hollow carbon nanospheres as a high-performance anode material for potassium ion batteries, *Journal of Materials Chemistry A*, 6 (2018)

24317-24323.

[27] C. Lv, W. Xu, H. Liu, L. Zhang, S. Chen, X. Yang, X. Xu, D. Yang, 3D sulfur and nitrogen codoped carbon nanofiber aerogels with optimized electronic structure and enlarged interlayer spacing boost potassium-ion storage, *Small*, 15 (2019) 1900816.

[28] W. Wang, J. Zhou, Z. Wang, L. Zhao, P. Li, Y. Yang, C. Yang, H. Huang, S. Guo, Short-range order in mesoporous carbon boosts potassium-ion battery performance, *Advanced Energy Materials*, 8 (2018) 1701648.

[29] L. Tao, Y. Yang, H. Wang, Y. Zheng, H. Hao, W. Song, J. Shi, M. Huang, D. Mitlin, Sulfur-nitrogen rich carbon as stable high capacity potassium ion battery anode: Performance and storage mechanisms, *Energy Storage Materials*, 27 (2020) 212-225.

[30] C. Gao, Q. Wang, S. Luo, Z. Wang, Y. Zhang, Y. Liu, A. Hao, R. Guo, High performance potassium-ion battery anode based on biomorphic N-doped carbon derived from walnut septum, *Journal of power sources*, 415 (2019) 165-171.

[31] J. Chen, B. Yang, H. Li, P. Ma, J. Lang, X. Yan, Candle soot: onion-like carbon, an advanced anode material for a potassium-ion hybrid capacitor, *Journal of Materials Chemistry A*, 7 (2019) 9247-9252.

[32] P. Xiong, X. Zhao, Y. Xu, Nitrogen-doped carbon nanotubes derived from metal-organic frameworks for potassium-ion battery anodes, *ChemSusChem*, 11 (2018) 202-208.

[33] W. Zong, N. Chui, Z. Tian, Y. Li, C. Yang, D. Rao, W. Wang, J. Huang, J. Wang,

F. Lai, Ultrafine MoP nanoparticle splotted nitrogen-doped carbon nanosheets enabling high-performance 3D-printed potassium-ion hybrid capacitors, *Advanced Science*, 8 (2021) 2004142.

[34] Z. Zhang, M. Li, Y. Gao, Z. Wei, M. Zhang, C. Wang, Y. Zeng, B. Zou, G. Chen, F. Du, Fast potassium storage in hierarchical  $\text{Ca}_{0.5}\text{Ti}_2(\text{PO}_4)_3@ \text{C}$  microspheres enabling high-performance potassium-ion capacitors, *Advanced Functional Materials*, 28 (2018) 1802684.

[35] Z. Pan, Y. Qian, Y. Li, X. Xie, N. Lin, Y. Qian, Novel bilayer-shelled N, O-doped hollow porous carbon microspheres as high performance anode for potassium-ion hybrid capacitors, *Nano-Micro Letters*, 15 (2023) 151.

[36] L. Fan, K. Lin, J. Wang, R. Ma, B. Lu, A nonaqueous potassium-based battery–supercapacitor hybrid device, *Advanced materials*, 30 (2018) 1800804.

[37] Z. Xie, J. Xia, D. Qiu, J. Wei, M. Li, F. Wang, R. Yang, Rich-phosphorus/nitrogen co-doped carbon for boosting the kinetics of potassium-ion hybrid capacitors, *Sustainable Energy & Fuels*, 6 (2022) 162-169.

[38] Y. Li, Y. Yang, P. Zhou, T. Gao, Z. Xu, S. Lin, H. Chen, J. Zhou, S. Guo, Enhanced cathode and anode compatibility for boosting both energy and power densities of Na/K-ion hybrid capacitors, *Matter*, 1 (2019) 893-910.

[39] D. Qiu, J. Guan, M. Li, C. Kang, J. Wei, Y. Li, Z. Xie, F. Wang, R. Yang, Kinetics enhanced nitrogen-doped hierarchical porous hollow carbon spheres boosting advanced potassium-ion hybrid capacitors, *Advanced Functional Materials*, 29 (2019) 1903496.

- [40] X. Li, M. Chen, L. Wang, H. Xu, J. Zhong, M. Zhang, Y. Wang, Q. Zhang, L. Mei, T. Wang, Nitrogen-doped carbon nanotubes as an anode for a highly robust potassium-ion hybrid capacitor, *Nanoscale Horizons*, 5 (2020) 1586-1595.
- [41] Y. Yi, Z. Sun, C. Li, Z. Tian, C. Lu, Y. Shao, J. Li, J. Sun, Z. Liu, Designing 3D biomorphic nitrogen-doped MoSe<sub>2</sub>/graphene composites toward high-performance potassium-ion capacitors, *Advanced Functional Materials*, 30 (2020) 1903878.
- [42] B. Fan, J. Yan, A. Hu, Z. Liu, W. Li, Y. Li, Y. Xu, Y. Zhang, Q. Tang, X. Chen, High-performance potassium ion capacitors enabled by hierarchical porous, large interlayer spacing, active site rich-nitrogen, and sulfur Co-doped carbon, *Carbon*, 164 (2020) 1-11.
- [43] M. Chen, L. Wang, X. Sheng, T. Wang, J. Zhou, S. Li, X. Shen, M. Zhang, Q. Zhang, X. Yu, An ultrastable nonaqueous potassium-ion hybrid capacitor, *Advanced Functional Materials*, 30 (2020) 2004247.
- [44] H. Luo, M. Chen, J. Cao, M. Zhang, S. Tan, L. Wang, J. Zhong, H. Deng, J. Zhu, B. Lu, Hierarchically Porous Carbon as Anode for Highly Robust Potassium-Ion Hybrid Capacitors, *Nano-Micro Lett*, 12 (2020) 113.
- [45] G. Wang, W. Wang, X. He, J. Li, L. Yu, B. Peng, G. Zhang, Concurrent manipulation of anion and cation adsorption kinetics in pancake-like carbon achieves ultrastable potassium ion hybrid capacitors, *Energy Storage Materials*, 46 (2022) 10-19.
- [46] Y. Yi, Z. Zeng, X. Lian, S. Dou, J. Sun, Homologous Nitrogen-Doped Hierarchical Carbon Architectures Enabling Compatible Anode and Cathode for

Potassium-Ion Hybrid Capacitors, *Small*, 18 (2022) 2107139.

[47] S. Zhao, K. Yan, J. Liang, Q. Yuan, J. Zhang, B. Sun, P. Munroe, G. Wang, Phosphorus and oxygen dual-doped porous carbon spheres with enhanced reaction kinetics as anode materials for high-performance potassium-ion hybrid capacitors, *Advanced Functional Materials*, 31 (2021) 2102060.
